# Supplementary material for: Molecular characterization, expression patterns and cellular localization of BCAS2 gene in male Hezuo pig
Source: PeerJ journal article supplement (doi:10.7717/peerj.16341), 2023-10-24
Supplement: BCAS2qRTPCR_raw_data.zip [file BCAS2qRTPCR_raw_data.zip]

## Sheet: BCAS2 qRT-PCR
Tissue	CP value			Reference gene mean	Δct value=CP-Reference gene mean			Δct mean=（Δct1+Δct2+Δct3）/3	Δct mean maximum	ΔΔct value=Δct-Δct mean maximum			2^(-ΔΔct)			Mean value of relative expression
	CP1	CP2	CP3		Δct1	Δct2	Δct3			ΔΔct1	ΔΔct2	ΔΔct3	Relative expression
													2^(-ΔΔct1)	2^(-ΔΔct2)	2^(-ΔΔct3)
30d testis	23.57	23.8	23.59	20.27	3.3	3.53	3.32	3.38333	3.38333	-0.0833333	0.146667	-0.0633333	1.05946	0.903335	1.04488	1.00256
120d testis	22.36	22.26	22.5	21.8467	0.513333	0.413333	0.653333	0.526667	3.38333	-2.87	-2.97	-2.73	7.31065	7.83536	6.63456	7.26019
240d testis	23.3	23.38	23.29	23.63	-0.33	-0.25	-0.34	-0.306667	3.38333	-3.71333	-3.63333	-3.72333	13.1167	12.4092	13.2079	12.9113
					0	0	0	0	0	0	0	0	1	1	1	1
heart	24.14	24.51	24.29	21.13	3.01	3.38	3.16	3.18333	4.92333	-1.91333	-1.54333	-1.76333	3.76678	2.91467	3.39482	3.35876
liver	22.64	23.14	23.21	18.0733	4.56667	5.06667	5.13667	4.92333	4.92333	-0.356667	0.143333	0.213333	1.28046	0.905425	0.862542	1.01614
spleen	23.57	23.97	23.75	20.6767	2.89333	3.29333	3.07333	3.08667	4.92333	-2.03	-1.63	-1.85	4.08405	3.09513	3.605	3.59473
lung	23.65	24.2	24.21	20.37	3.28	3.83	3.84	3.65	4.92333	-1.64333	-1.09333	-1.08333	3.12387	2.13366	2.11893	2.45882
kinney	23.57	23.66	23.39	20.02	3.55	3.64	3.37	3.52	4.92333	-1.37333	-1.28333	-1.55333	2.59068	2.43401	2.93494	2.65321
testis	25.52	25.49	25.68	23.04	2.48	2.45	2.64	2.52333	4.92333	-2.44333	-2.47333	-2.28333	5.43897	5.55325	4.86801	5.28675
																				1
